# Supplementary material
Source: Springer Nature journal article supplement (https://www.springermedizin.de/resource/supplementary/12985_2008_480_MOESM3_ESM.pdf/9607844)

**A.****A/Vietnam/1203/2004 (clade 1)**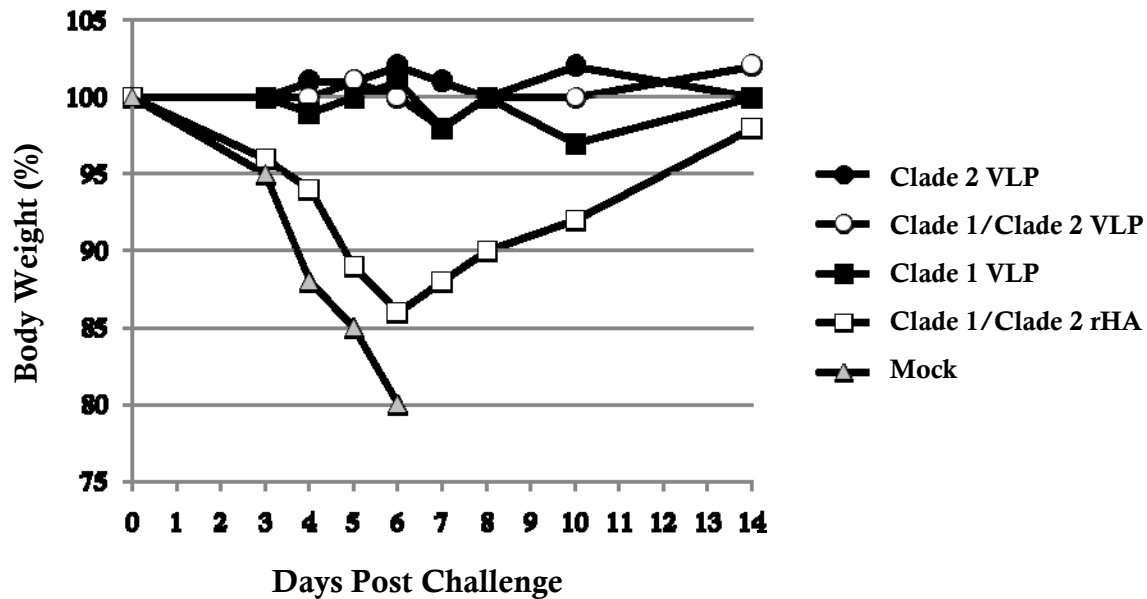**B.****A/Indonesia/05/2005 (clade 2)**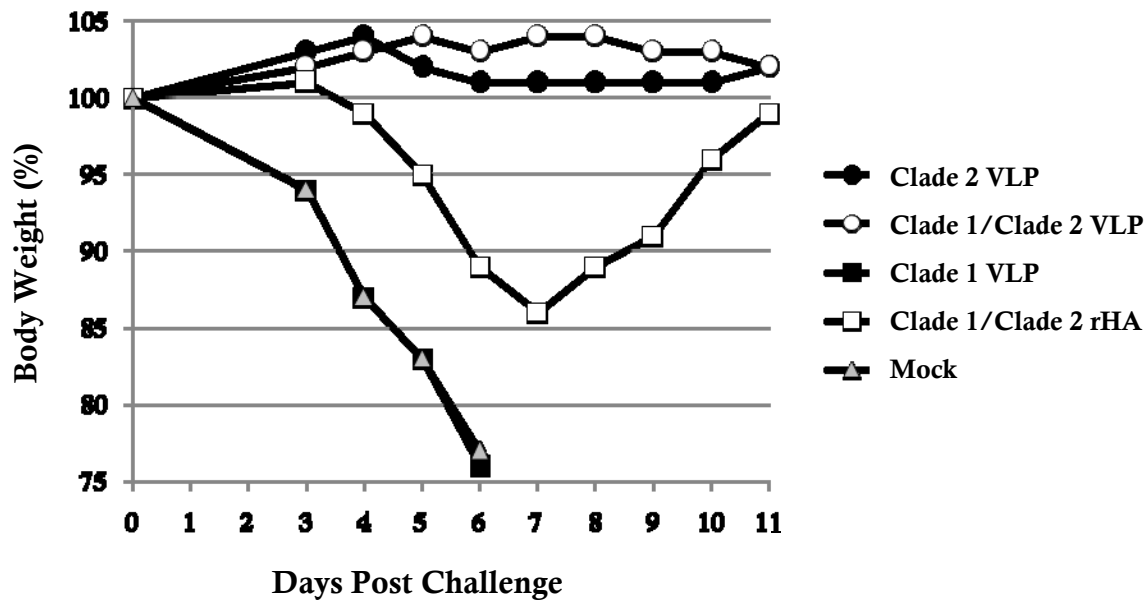

Supplement: MOESM3 [file 9607844]
